# Supplementary material for: Antifungal Activities of Essential Oils in Vapor Phase against Botrytis cinerea and Their Potential to Control Postharvest Strawberry Gray Mold
Source: MDPI journal article supplement (doi:10.3390/foods11192945), 2022-09-20
Supplement: s1 [file s1]

**Table S1.** Relative inhibition of *Botrytis cinerea* growth on PDA medium (22±1 °C) after treatment by essential oils (625 ul.L<sup>-1</sup>)

| Strain     | Kmi-284         |                 |                 |                 | Kmi-507         |                 |                 |                 | KMi508          |                 |                 |                 |
|------------|-----------------|-----------------|-----------------|-----------------|-----------------|-----------------|-----------------|-----------------|-----------------|-----------------|-----------------|-----------------|
| Day        | 2 <sup>nd</sup> | 3 <sup>rd</sup> | 4 <sup>th</sup> | 7 <sup>th</sup> | 2 <sup>nd</sup> | 3 <sup>rd</sup> | 4 <sup>th</sup> | 7 <sup>th</sup> | 2 <sup>nd</sup> | 3 <sup>rd</sup> | 4 <sup>th</sup> | 7 <sup>th</sup> |
| Cardamom   | 100b            | 100d            | 100c            | 88.3b           | 100c            | 100d            | 100d            | 100c            | 100c            | 100d            | 100d            | 100b            |
| Eucalyptus | 100b            | 100d            | 100c            | 100c            | 100c            | 100d            | 87c             | 35.4b           | 100c            | 100d            | 100d            | 100b            |
| Ginger     | 100b            | 81.5c           | 45.2b           | 0a              | 47.5b           | 30.8b           | 0a              | 0a              | 73.9b           | 42.5b           | 30.2b           | 0a              |
| Grapefruit | 100b            | 75.9b           | 45.4b           | 0a              | 100c            | 47.2c           | 43.3b           | 0a              | 100c            | 59.8c           | 41.3c           | 0a              |
| Jasmine    | -19.4a          | -0.6a           | 0a              | 0a              | 7.8a            | 11.4a           | 0a              | 0a              | 0a              | 14a             | 0a              | 0a              |
| Lemongrass | 100b            | 100d            | 100c            | 100c            | 100c            | 100d            | 100d            | 100c            | 100c            | 100d            | 100d            | 100b            |
| Levander   | 100b            | 100d            | 100c            | 100c            | 100c            | 100d            | 100d            | 100c            | 100c            | 100d            | 100d            | 100b            |
| Litsea     | 100b            | 100d            | 100c            | 100c            | 100c            | 100d            | 100d            | 100c            | 100c            | 100d            | 100d            | 100b            |
| Mint       | 100b            | 100d            | 100c            | 100c            | 100c            | 100d            | 100d            | 100c            | 100c            | 100d            | 100d            | 100b            |
| Peppermint | 100b            | 100d            | 100c            | 100c            | 100c            | 100d            | 100d            | 100c            | 100c            | 100d            | 100d            | 100b            |
| Petitgrain | 100b            | 100d            | 100c            | 100c            | 100c            | 100d            | 100d            | 100c            | 100c            | 100d            | 100d            | 100b            |
| Sage       | 100b            | 100d            | 100c            | 100c            | 100c            | 100d            | 100d            | 100c            | 100c            | 100d            | 100d            | 100b            |
| Thyme      | 100b            | 100d            | 100c            | 100c            | 100c            | 100d            | 100d            | 100c            | 100c            | 100d            | 100d            | 100b            |

\* Values followed by the same letter (in single column) are not significantly different on  $\alpha=0.05$  ANOVA, Tukey HSD post-hoc test.

**Table S2.** Sensory evaluation of strawberries treated with essential oils after 3 days of storage

| Essential oils | Taste |      |            | Appearance |      |            | Aroma |      |            | Aftertaste |      |            | Overall acceptability |      |            |
|----------------|-------|------|------------|------------|------|------------|-------|------|------------|------------|------|------------|-----------------------|------|------------|
|                | Mean  | ± SE | Hom. Group | Mean       | ± SE | Hom. Group | Mean  | ± SE | Hom. Group | Mean       | ± SE | Hom. Group | Mean                  | ± SE | Hom. Group |
| Control        | 8.47  | 0.22 | c          | 8.27       | 0.18 | a          | 8.67  | 0.16 | b          | 8.67       | 0.16 | c          | 8.73                  | 0.12 | c          |
| Lemongrass     | 6.66  | 0.29 | b          | 7.73       | 0.27 | a          | 7.40  | 0.38 | b          | 6.47       | 0.35 | ab         | 7.07                  | 0.32 | bc         |
| Litsea         | 1.6   | 0.47 | b          | 7.73       | 0.30 | a          | 7.47  | 0.38 | b          | 6.87       | 0.53 | b          | 6.67                  | 0.68 | ab         |
| Peppermint     | 5.53  | 0.29 | ab         | 7.93       | 0.23 | a          | 5.73  | 0.51 | a          | 5.93       | 0.25 | ab         | 5.00                  | 0.46 | a          |
| Thyme          | 4.87  | 0.52 | a          | 8.13       | 0.24 | a          | 5.73  | 0.52 | a          | 5.20       | 0.42 | a          | 5.40                  | 0.62 | ab         |

\* Values followed by the same letter (in single column) are not significantly different on  $\alpha=0.05$  ANOVA, Tukey HSD post-hoc test.
